# Supplementary material
Source: PubMed Central journal article supplement (PMC2610517)

## SUPPLEMENTAL MATERIALS

**I. Supplemental Table 1.** Gene List for dChip Clustering Analysis

**II. Supplemental Table 2.** Primers Used for Hey1 Expression Cloning, siRNAs, qPCR and ChIP Analysis.

**III. Supplemental Fig. 1.**

**Suppl. Fig. 1.** Hey1 acts synergistically with BMP9 in osteogenic differentiation and the Hey1 knockdown phenotype can be rescued by Runx2. (A) Overexpression of Hey1 potentiates BMP9-induced ALP activity. Subconfluent cells were infected with AdBMP9, AdGFP, and/or AdHey1. ALP activity was determined at the indicated time points. (B) Histologic evidence of the Runx2 rescue effect on the Hey1<sup>KD</sup> MSCs. Magnification, 100x. (C) MicroCT images (slices) of ectopic bone formation *in vivo*. The MSC implantation experiments were carried out as described in **Fig. 5A** and **Fig. 5C**. (D) Adenovirusmediated Hey1 expression enhanced bone matrix mineralization in MEFs. The *in vivo* experiments and the histologic analysis were carried out as described in **Fig. 5C**.

**Supplemental Table 1. Genes whose expression was significantly regulated by BMP9 in mesenchymal stem cells (> 2-fold, p < 0.05)**

| Gene Description       | Accession No. | GFP Control |         |         |         |        | BMP-9   |        |        |        |       | Fold change | P-value |
|------------------------|---------------|-------------|---------|---------|---------|--------|---------|--------|--------|--------|-------|-------------|---------|
|                        |               | C1          | C2      | C3      | Mean    | SE     | B1      | B2     | B3     | Mean   | SE    |             |         |
| growth hormone         | BB026315      | 133.8       | 119.6   | 121.7   | 124.0   | 12.9   | 1005.68 | 672.3  | 753.9  | 810.3  | 99.9  | 6.53        | 0.0191  |
| Hey1                   | NM_010423     | 447.3       | 436.0   | 422.8   | 435.1   | 46.3   | 2421.98 | 2953.5 | 1509.4 | 2290.8 | 431.3 | 5.26        | 0.0485  |
| EST                    | AK017880      | 550.3       | 582.0   | 354.8   | 496.4   | 73.4   | 3135.6  | 1893.9 | 2144.9 | 2391.5 | 377.6 | 4.82        | 0.0335  |
| PGS2                   | M88242        | 289.3       | 175.9   | 62.3    | 175.9   | 65.6   | 869.87  | 620.8  | 979.9  | 823.8  | 105.9 | 4.68        | 0.0105  |
| EST                    | NM_133874     | 387.5       | 423.8   | 430.9   | 412.2   | 64.6   | 2409.22 | 1814.0 | 1574.3 | 1920.5 | 254.0 | 4.66        | 0.0217  |
| EST                    | BM220945      | 334.2       | 378.3   | 321.5   | 346.7   | 22.6   | 1678.45 | 1566.1 | 1434.5 | 1558.7 | 72.7  | 4.5         | 0.0018  |
| MLLT7                  | AB032770      | 320.4       | 262.0   | 212.2   | 261.8   | 50.9   | 1173.71 | 989.2  | 1135.9 | 1093.3 | 67.1  | 4.18        | 0.0008  |
| Smad7                  | BF226166      | 360.1       | 559.3   | 458.0   | 458.7   | 73.5   | 1727    | 1874.1 | 1999.1 | 1876.2 | 94.5  | 4.09        | 0.0004  |
| Serpine1               | NM_008871     | 784.8       | 1832.3  | 795.0   | 1135.4  | 359.7  | 3858.56 | 4516.0 | 5154.7 | 4505.4 | 394.5 | 3.97        | 0.0033  |
| fibromodulin           | BB235530      | 366.1       | 596.2   | 1237.5  | 732.8   | 261.8  | 3240.93 | 2921.8 | 2486.4 | 2876.1 | 224.0 | 3.93        | 0.0037  |
| Bcat1                  | X17502        | 458.0       | 765.1   | 736.1   | 652.2   | 102.6  | 2369.32 | 2133.0 | 3025.5 | 2509.7 | 267.3 | 3.85        | 0.0117  |
| calpain 1              | BC026138      | 762.4       | 667.7   | 705.9   | 710.9   | 131.9  | 2851.01 | 2340.6 | 2578.4 | 2575.3 | 180.8 | 3.62        | 0.0017  |
| MMP11                  | NM_008606     | 308.7       | 237.8   | 425.9   | 321.5   | 57.3   | 1228.92 | 1376.3 | 794.8  | 1133.1 | 176.0 | 3.52        | 0.0338  |
| transthyretin          | BC024702      | 358.1       | 304.1   | 326.9   | 327.7   | 73.8   | 1274.55 | 1103.6 | 891.8  | 1073.1 | 136.0 | 3.27        | 0.0160  |
| EST                    | BM231053      | 1414.0      | 1692.6  | 1436.5  | 1516.8  | 104.0  | 5511.26 | 4761.6 | 4127.1 | 4802.7 | 409.8 | 3.17        | 0.0113  |
| Smad6                  | AF010133      | 1248.0      | 1780.8  | 1269.9  | 1449.5  | 204.1  | 4777.73 | 4553.6 | 4328.7 | 4515.3 | 197.5 | 3.12        | 0.0004  |
| importin 4a            | NM_024267     | 816.1       | 859.0   | 969.4   | 873.0   | 163.6  | 3221.42 | 2772.5 | 2318.3 | 2724.0 | 325.7 | 3.12        | 0.0154  |
| Kruppel-like factor 10 | NM_013692     | 292.7       | 418.5   | 237.3   | 316.6   | 56.2   | 1036.56 | 955.3  | 867.6  | 949.2  | 54.7  | 3           | 0.0013  |
| C1qtnf3                | NM_030888     | 98.3        | 82.3    | 103.6   | 94.0    | 11.9   | 330.27  | 250.7  | 265.9  | 279.6  | 26.6  | 2.98        | 0.0098  |
| Tsta3                  | NM_031201     | 962.3       | 913.2   | 909.8   | 930.0   | 78.7   | 3045.09 | 2658.4 | 2432.7 | 2705.9 | 198.7 | 2.91        | 0.0060  |
| Kcnk5                  | BI107337      | 230.8       | 212.1   | 182.1   | 208.5   | 21.7   | 677.14  | 573.9  | 531.9  | 590.2  | 47.1  | 2.83        | 0.0064  |
| EST                    | BC022622      | 373.2       | 340.0   | 383.3   | 363.8   | 47.2   | 1199.55 | 989.8  | 939.6  | 1027.2 | 97.3  | 2.82        | 0.0097  |
| EST                    | BF578055      | 530.8       | 554.0   | 632.1   | 571.6   | 50.9   | 1869.8  | 1602.5 | 1325.5 | 1589.7 | 172.8 | 2.78        | 0.0206  |
| Hspa5                  | AJ002387      | 1929.3      | 2286.7  | 1839.1  | 2022.5  | 165.3  | 6142.37 | 5185.3 | 5255.7 | 5525.4 | 310.8 | 2.73        | 0.0020  |
| Rassf5                 | NM_018750     | 116.5       | 151.7   | 147.7   | 141.5   | 17.8   | 428.83  | 392.1  | 299.4  | 372.9  | 39.7  | 2.64        | 0.0158  |
| lunatic fringe homolog | AK004642      | 269.7       | 332.6   | 292.9   | 301.9   | 31.4   | 808.19  | 805.7  | 738.6  | 782.4  | 34.0  | 2.59        | 0.0005  |
| EST                    | AK009669      | 1036.0      | 1026.7  | 899.2   | 1005.5  | 69.5   | 2518.71 | 2319.6 | 2746.1 | 2536.1 | 127.0 | 2.52        | 0.0016  |
| EST                    | BC024445      | 348.8       | 475.3   | 373.1   | 400.1   | 49.8   | 939.93  | 964.5  | 1001.8 | 973.0  | 32.9  | 2.43        | 0.0013  |
| Limk1                  | NM_010717     | 163.1       | 164.7   | 170.2   | 166.2   | 8.5    | 404.14  | 337.4  | 422.8  | 387.6  | 27.1  | 2.33        | 0.0094  |
| Tmeff1                 | BM114154      | 293.0       | 317.8   | 292.0   | 300.9   | 13.6   | 671.85  | 685.0  | 671.4  | 673.9  | 11.7  | 2.24        | 0.0000  |
| EST                    | AV174022      | 1902.5      | 1722.3  | 1540.0  | 1743.6  | 121.7  | 714.36  | 621.2  | 678.2  | 673.4  | 30.0  | -2.59       | 0.0094  |
| pleiotrophin           | BF178348      | 17512.1     | 12745.4 | 13816.3 | 14669.7 | 1456.1 | 4860.16 | 5007.2 | 5766.8 | 5217.2 | 472.6 | -2.81       | 0.0156  |
| laminin B1 subunit 1   | M15525        | 231.4       | 350.6   | 244.2   | 276.9   | 40.2   | 95.91   | 89.8   | 105.2  | 96.2   | 6.9   | -2.88       | 0.0426  |
| MME                    | NM_008604     | 2093.5      | 2087.2  | 1800.9  | 1997.5  | 99.8   | 696.07  | 660.1  | 679.1  | 679.3  | 17.3  | -2.94       | 0.0047  |
| EST                    | BB008324      | 2078.5      | 1625.2  | 1507.5  | 1740.3  | 176.6  | 662.22  | 686.0  | 416.0  | 588.6  | 88.2  | -2.96       | 0.0106  |
| EST                    | NM_134072     | 398.6       | 453.0   | 545.8   | 465.5   | 44.5   | 154.61  | 143.8  | 168.4  | 156.5  | 8.5   | -2.97       | 0.0173  |
| Synaptopodin           | BB426294      | 930.7       | 1168.5  | 1227.0  | 1106.5  | 98.0   | 389.16  | 459.1  | 252.4  | 366.7  | 62.2  | -3.02       | 0.0054  |
| GSTM1                  | NM_010358     | 4579.9      | 4361.6  | 2984.7  | 3988.1  | 507.2  | 1022.37 | 1188.6 | 1164.8 | 1130.8 | 71.4  | -3.53       | 0.0281  |
| EST                    | BC028307      | 867.1       | 740.7   | 901.3   | 834.5   | 51.5   | 222.07  | 193.4  | 228.7  | 214.5  | 20.0  | -3.89       | 0.0029  |
| Plscr1                 | NM_008880     | 612.6       | 741.7   | 509.9   | 621.8   | 69.2   | 160.44  | 201.6  | 114.3  | 157.4  | 27.3  | -3.95       | 0.0124  |

**Supplemental Table 2. Oligonucleotide Primer Sequences**

| Use                         | Sequence                                       |
|-----------------------------|------------------------------------------------|
| simHey1 site-1 forward      | 5'-aCGACGAGACCGAATCAATAtttt-3'                 |
| simHey1 site-1 reverse      | 5'-aTATTGATTCCGGTCTCGTCGtttt-3'                |
| simHey1 site-2 forward      | 5'-aGGACGAGAATGGAAACTTGtttt-3'                 |
| simHey1 site-2 reverse      | 5'-aCAAGTTTCCATTCTCGTCctttt-3'                 |
| simHey1 site-3 forward      | 5'-aCCATCTCAACAACCTACGCAtttt-3'                |
| simHey1 site-3 reverse      | 5'-aTGCGTAGTTGTTGAGATGGtttt-3'                 |
| mouse Hey1 CDS qPCR forward | 5'-CGCCCTGGCTATGGACTA-3'                       |
| mouse Hey1 CDS qPCR reverse | 5'-GAGACCAGGCGAACGAGA-3'                       |
| mouse Hey1 qPCR forward     | 5'-GGCCTGCTTGGCTTTTCT-3'                       |
| mouse Hey1 qPCR reverse     | 5'-CCAAGTGCAGGCAAGGTC-3'                       |
| Adenoviral Hey1 CDS forward | 5'-cgcgtcgaccatgggcATGAAGAGAGCTCACCCAGACTAC-3' |
| Adenoviral Hey1 CDS reverse | 5'-TGCTCTAGAttAGAAAGCTCCGATCTCTGTCCCCCAAG-3'   |
| Retroviral Hey1 CDS forward | 5'-CCCAAGCTTGCATGAAGAGAGCTCACCCAGACTAC-3'      |
| Retroviral Hey1 CDS reverse | 5'-ccgacgcgtGAAAGCTCCGATCTCTGTCCCCCAAG-3'      |
| ChIP PP-1 forward           | 5'-GCCTTGCAGGATTAGCTTTAGA-3'                   |
| ChIP PP-1 reverse           | 5'-GGTGTGAACCTGTAATCGGAGT-3'                   |
| ChIP PP-2 forward           | 5'-ACCTTTTCAGAGGAGCTGTGAG-3'                   |
| ChIP PP-2 reverse           | 5'-TCCCGTCTATGAAGCAAACTT-3'                    |
| ChIP PP-3 forward           | 5'-CATGCAGAAGACACTTTGGAAG-3'                   |
| ChIP PP-3 reverse           | 5'-GAGGCAAAATTTTCATGAGTTCC-3'                  |

Sharff et al. Suppl. Fig. 1

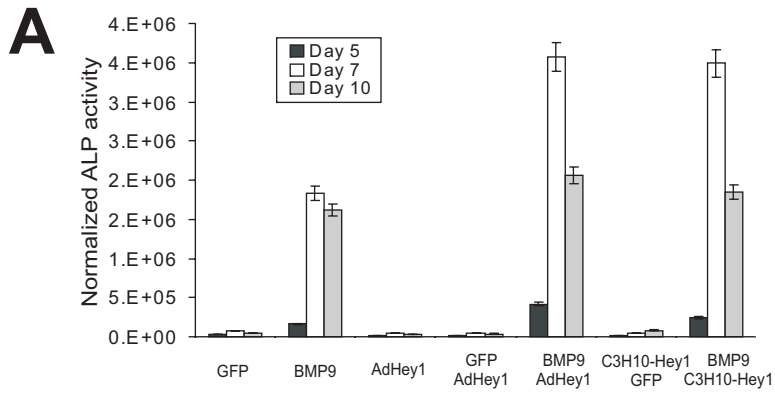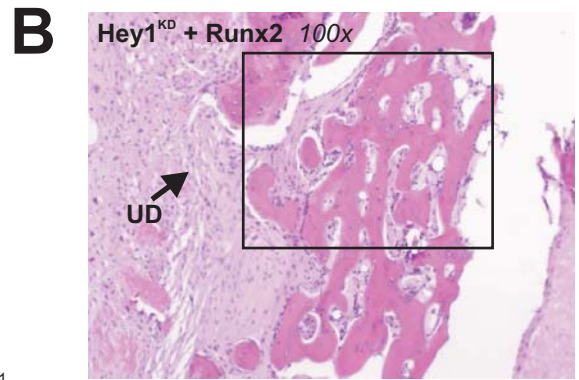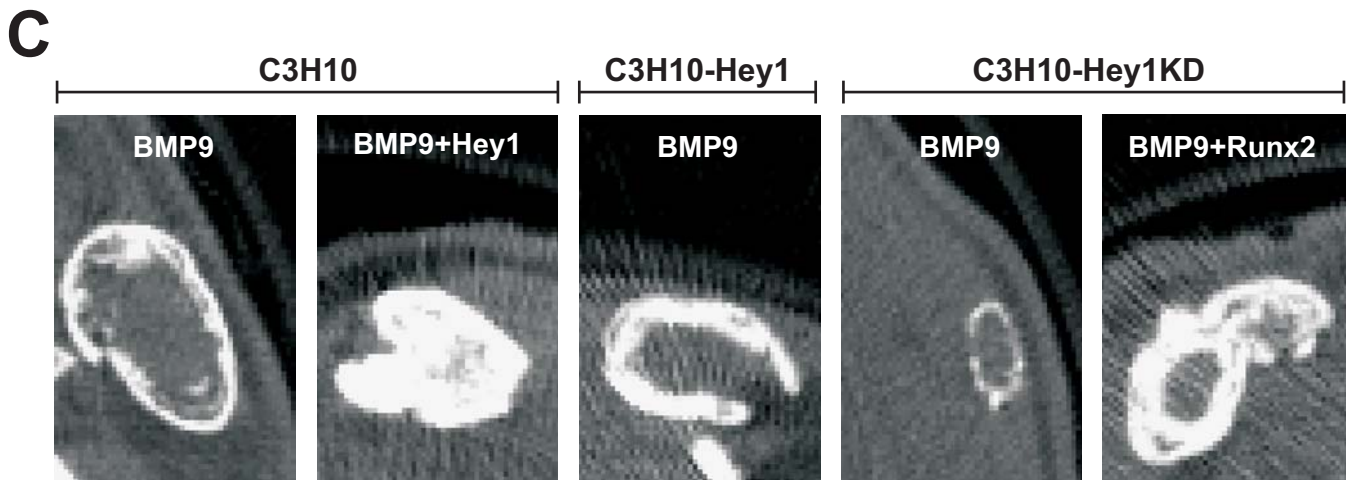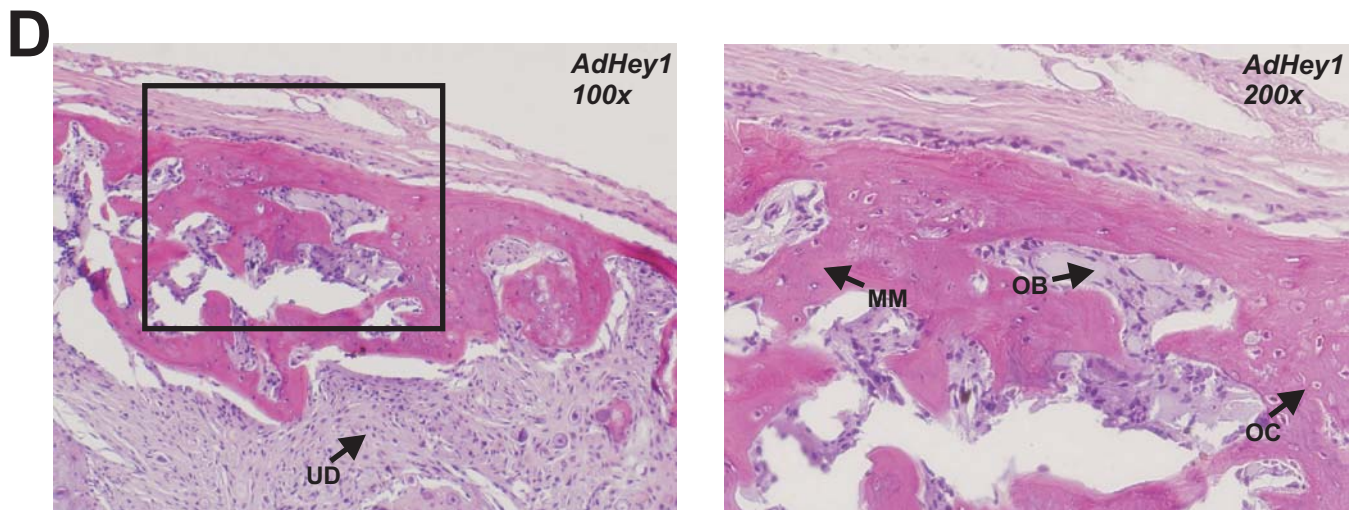

Supplement: M806389200_1.pdf [file M806389200_1.pdf]
